# Supplementary material
Source: PubMed Central journal article supplement (PMC5740976)
Supplement: 31.1.e00045-17_zcm001182618s1.pdf [file 31.1.e00045-17_zcm001182618s1.pdf]

Supplementary Table 1. Clinical and environmental *M. ulcerans* isolates.

| <b>Strain ID/Strains<br/>collection</b> | <b>Source</b> | <b>Geography<br/>origin</b> | <b>Isolation<br/>year</b> | <b>A.N</b> | <b>Reference</b> | <b>Available strains</b> |
|-----------------------------------------|---------------|-----------------------------|---------------------------|------------|------------------|--------------------------|
| <b>1</b> S15                            | Human         | Ghana                       | 2010                      | ERA401876  | (1)              |                          |
| <b>2</b> S43                            | Human         | Ghana                       | 2010                      | ERA401876  | (1)              |                          |
| <b>3</b> S38                            | Human         | Ghana                       | 2010                      | ERA401876  | (1)              |                          |
| <b>4</b> S77                            | Human         | Ghana                       | 2010                      | ERA401876  | (1)              |                          |
| <b>5</b> S72                            | Human         | Ghana                       | 2011                      | ERA401876  | (1)              |                          |
| <b>6</b> 712 (S24)                      | Human         | Ghana                       | 2012                      | ERA401876  | (1)              |                          |
| <b>7</b> F64                            | Human         | Ghana                       | 2010                      | ERA401876  | (1)              |                          |
| <b>8</b> F70                            | Human         | Ghana                       | 2010                      | ERA401876  | (1)              |                          |
| <b>9</b> 1510 (F79)                     | Human         | Ghana                       | 2010                      | ERA401876  | (1)              |                          |
| <b>10</b> F75                           | Human         | Ghana                       | 2010                      | ERA401876  | (1)              |                          |
| <b>11</b> F85                           | Human         | Ghana                       | 2010                      | ERA401876  | (1)              |                          |
| <b>12</b> 2610 (F92)                    | Human         | Ghana                       | 2010                      | ERA401876  | (1)              |                          |

|           |            |       |       |      |           |     |
|-----------|------------|-------|-------|------|-----------|-----|
| <b>13</b> | F13        | Human | Ghana | 2011 | ERA401876 | (1) |
| <b>14</b> | F65        | Human | Ghana | 2011 | ERA401876 | (1) |
| <b>15</b> | F74        | Human | Ghana | 2011 | ERA401876 | (1) |
| <b>16</b> | 612 (F36)  | Human | Ghana | 2012 | ERA401876 | (1) |
| <b>17</b> | 212 (F3)   | Human | Ghana | 2012 | ERA401876 | (1) |
| <b>18</b> | 412 (F37)  | Human | Ghana | 2012 | ERA401876 | (1) |
| <b>19</b> | Mu_NM14.01 | Human | Ghana | 2001 | SRP004497 | (2) |
| <b>20</b> | Mu_NM33.04 | Human | Ghana | 2004 | SRP004497 | (2) |
| <b>21</b> | Mu_NM43.02 | Human | Ghana | 2002 | SRP004497 | (2) |
| <b>22</b> | Mu_NM49.02 | Human | Ghana | 2002 | SRP004497 | (2) |
| <b>23</b> | Mu_NM54.02 | Human | Ghana | 2002 | SRP004497 | (2) |
| <b>24</b> | NM20/02    | Human | Ghana | 2002 | SRA008258 | (3) |
| <b>25</b> | NM31/04    | Human | Ghana | 2004 | SRA008258 | (3) |
| <b>26</b> | NM022B     | Human | Ghana | 2004 | ND        | (4) |
| <b>27</b> | NM022D     | Human | Ghana | 2004 | ND        | (4) |
| <b>28</b> | NM031      | Human | Ghana | 2004 | ND        | (4) |

|           |                          |       |       |      |             |     |
|-----------|--------------------------|-------|-------|------|-------------|-----|
| <b>29</b> | NM972                    | Human | Ghana | 2013 | ND          | (4) |
| <b>30</b> | NM997                    | Human | Ghana | 2013 | ND          | (4) |
| <b>31</b> | ITM1837                  | Human | Ghana | ND   | ND          | (5) |
| <b>32</b> | IFIK 1066089             | Human | Ghana | ND   | ND          | (6) |
| <b>33</b> | ITM 970321               | Human | Ghana | ND   | ND          | (6) |
| <b>34</b> | ITM 970359               | Human | Ghana | ND   | ND          | (6) |
| <b>35</b> | ITM 970483               | Human | Ghana | ND   | ND          | (6) |
| <b>36</b> | <i>M. ulcerans</i> -moss | Moss  | Ghana | 2013 | ND          | (7) |
| <b>37</b> | <i>M. ulcerans</i> -soil | Soil  | Ghana | 2013 | ND          | (7) |
| <b>38</b> | ITM_970359               | Human | Ghana | 1997 | PRJNA313185 | (8) |
| <b>39</b> | ITM_970606               | Human | Ghana | 1997 | PRJNA313185 | (8) |
| <b>40</b> | ITM_970677               | Human | Ghana | 1997 | PRJNA313185 | (8) |
| <b>41</b> | ITM_970678               | Human | Ghana | 1997 | PRJNA313185 | (8) |
| <b>42</b> | ITM_970959               | Human | Ghana | 1997 | PRJNA313185 | (8) |
| <b>43</b> | ITM_970964               | Human | Ghana | 1997 | PRJNA313185 | (8) |
| <b>44</b> | ITM_971351               | Human | Ghana | 1997 | PRJNA313185 | (8) |

|    |            |       |       |      |             |     |
|----|------------|-------|-------|------|-------------|-----|
| 45 | ITM_980063 | Human | Ghana | 1998 | PRJNA313185 | (8) |
| 46 | ITM_072634 | Human | Ghana | 2007 | PRJNA313185 | (8) |
| 47 | ITM_072652 | Human | Ghana | 2007 | PRJNA313185 | (8) |
| 48 | ITM_072654 | Human | Ghana | 2007 | PRJNA313185 | (8) |
| 49 | ITM_072657 | Human | Ghana | 2007 | PRJNA313185 | (8) |
| 50 | ITM_072658 | Human | Ghana | 2007 | PRJNA313185 | (8) |
| 51 | ITM_072650 | Human | Ghana | 2007 | PRJNA313185 | (8) |
| 52 | ITM_072630 | Human | Ghana | 2007 | PRJNA313185 | (8) |
| 53 | ITM_072656 | Human | Ghana | 2007 | PRJNA313185 | (8) |
| 54 | ITM_072655 | Human | Ghana | 2007 | PRJNA313185 | (8) |
| 55 | ITM_072653 | Human | Ghana | 2007 | PRJNA313185 | (8) |
| 56 | ITM_072645 | Human | Ghana | 2007 | PRJNA313185 | (8) |
| 57 | ITM_040149 | Human | Ghana | 2003 | PRJNA313185 | (8) |
| 58 | ITM_072646 | Human | Ghana | 2007 | PRJNA313185 | (8) |
| 59 | ITM_072651 | Human | Ghana | 2007 | PRJNA313185 | (8) |
| 60 | 1059       | Human | Ghana | ND   | ND          | (9) |

|           |         |       |       |      |            |      |
|-----------|---------|-------|-------|------|------------|------|
| <b>61</b> | Agy99   | Human | Ghana | 1999 | CP000325.1 | (3)  |
| <b>62</b> | 97-101  | Human | Benin | 1997 | ND         | (10) |
| <b>63</b> | 97-112  | Human | Benin | 1997 | ND         | (10) |
| <b>64</b> | 97-617  | Human | Benin | 1997 | ND         | (10) |
| <b>65</b> | 97-1112 | Human | Benin | 1997 | ND         | (10) |
| <b>66</b> | 97-110  | Human | Benin | 1997 | ND         | (10) |
| <b>67</b> | 97-616  | Human | Benin | 1997 | ND         | (10) |
| <b>68</b> | 97-1116 | Human | Benin | 1997 | ND         | (10) |
| <b>69</b> | 98-700  | Human | Benin | 1998 | ND         | (10) |
| <b>70</b> | 98-1137 | Human | Benin | 1998 | ND         | (10) |
| <b>71</b> | 99-1563 | Human | Benin | 1999 | ND         | (10) |
| <b>72</b> | 99-1711 | Human | Benin | ND   | ND         | (10) |
| <b>73</b> | 98-156  | Human | Benin | 1998 | ND         | (10) |
| <b>74</b> | 98-239  | Human | Benin | 1998 | ND         | (10) |
| <b>75</b> | 99-742  | Human | Benin | 1999 | ND         | (10) |
| <b>76</b> | 99-684  | Human | Benin | 1999 | ND         | (10) |

|           |                           |                |       |      |           |      |          |
|-----------|---------------------------|----------------|-------|------|-----------|------|----------|
| <b>77</b> | 99-1642                   | Human          | Benin | 1999 | ND        | (10) |          |
| <b>78</b> | 99-1722                   | Human          | Benin | 1999 | ND        | (10) |          |
| <b>79</b> | 99-1567                   | Human          | Benin | 1999 | ND        | (10) |          |
| <b>80</b> | Mu_06-3845<br>(ITM001441) | Aquatic insect | Benin | 2008 | SRP004497 | (11) |          |
| <b>81</b> | Mu_06-3846<br>(ITM971116) | Human          | Benin | 1997 | SRP004497 | (2)  | BCCM-ITM |
| <b>82</b> | Mu_07-1082<br>(ITM030216) | Human          | Benin | 2003 | SRP004497 | (2)  |          |
| <b>83</b> | Mu_001506<br>(ITM001506)  | Human          | Benin | 2000 | SRP004497 | (2)  |          |
| <b>84</b> | Mu_980535<br>(ITM980535)  | Human          | Benin | 1998 | SRP004497 | (2)  |          |
| <b>85</b> | Mu_000945<br>(ITM000945)  | Human          | Benin | 2000 | SRP004497 | (2)  |          |
| <b>86</b> | Mu_991845<br>(ITM991845)  | Human          | Benin | 1999 | SRP004497 | (2)  |          |
| <b>87</b> | ITM980535                 | Human          | Benin | 1998 | ND        | (1)  |          |

|            |            |       |       |      |             |      |
|------------|------------|-------|-------|------|-------------|------|
| <b>88</b>  | ITM000945  | Human | Benin | 2000 | ND          | (1)  |
| <b>89</b>  | ITM001506  | Human | Benin | 2000 | ND          | (1)  |
| <b>90</b>  | ITM9146    | Human | Benin | ND   | ND          | (5)  |
| <b>91</b>  | ITM94-886  | Human | Benin | ND   | ND          | (5)  |
| <b>92</b>  | ITM 970111 | Human | Benin | ND   | ND          | (6)  |
| <b>93</b>  | ITM 940886 | Human | Benin | ND   | ND          | (6)  |
| <b>94</b>  | ITM 940512 | Human | Benin | ND   | ND          | (6)  |
| <b>95</b>  | ITM 970104 | Human | Benin | ND   | ND          | (6)  |
| <b>96</b>  | ITM-940512 | Human | Benin | ND   | ND          | (12) |
| <b>97</b>  | ITM_072814 | Human | Benin | 2007 | ND          | (12) |
| <b>98</b>  | ITM_940512 | Human | Benin | 1994 | PRJNA313185 | (8)  |
| <b>99</b>  | ITM_010157 | Human | Benin | 2001 | PRJNA313185 | (8)  |
| <b>100</b> | ITM_000951 | Human | Benin | 2000 | PRJNA313185 | (8)  |
| <b>101</b> | ITM_970435 | Human | Benin | 1997 | PRJNA313185 | (8)  |
| <b>102</b> | ITM_970301 | Human | Benin | 1997 | PRJNA313185 | (8)  |
| <b>103</b> | ITM_092100 | Human | Benin | 2009 | PRJNA313185 | (8)  |

|            |            |       |       |      |             |     |
|------------|------------|-------|-------|------|-------------|-----|
| <b>104</b> | ITM_083865 | Human | Benin | 2008 | PRJNA313185 | (8) |
| <b>105</b> | ITM_093013 | Human | Benin | 2009 | PRJNA313185 | (8) |
| <b>106</b> | ITM_093695 | Human | Benin | 2009 | PRJNA313185 | (8) |
| <b>107</b> | ITM_101300 | Human | Benin | 2010 | PRJNA313185 | (8) |
| <b>108</b> | ITM_101302 | Human | Benin | 2010 | PRJNA313185 | (8) |
| <b>109</b> | ITM_102554 | Human | Benin | 2010 | PRJNA313185 | (8) |
| <b>110</b> | ITM_081919 | Human | Benin | 2008 | PRJNA313185 | (8) |
| <b>111</b> | ITM_092997 | Human | Benin | 2009 | PRJNA313185 | (8) |
| <b>112</b> | ITM_080066 | Human | Benin | 2008 | PRJNA313185 | (8) |
| <b>113</b> | ITM_070381 | Human | Benin | 2007 | PRJNA313185 | (8) |
| <b>114</b> | ITM_073151 | Human | Benin | 2007 | PRJNA313185 | (8) |
| <b>115</b> | ITM_070131 | Human | Benin | 2007 | PRJNA313185 | (8) |
| <b>116</b> | ITM_092473 | Human | Benin | 2009 | PRJNA313185 | (8) |
| <b>117</b> | ITM_082549 | Human | Benin | 2008 | PRJNA313185 | (8) |
| <b>118</b> | ITM_090149 | Human | Benin | 2009 | PRJNA313185 | (8) |
| <b>119</b> | ITM_083584 | Human | Benin | 2008 | PRJNA313185 | (8) |



|            |            |       |       |      |             |     |
|------------|------------|-------|-------|------|-------------|-----|
| <b>120</b> | ITM_991721 | Human | Benin | 1999 | PRJNA313185 | (8) |
| <b>121</b> | ITM_092472 | Human | Benin | 2009 | PRJNA313185 | (8) |
| <b>122</b> | ITM_070383 | Human | Benin | 2007 | PRJNA313185 | (8) |
| <b>123</b> | ITM_081676 | Human | Benin | 2008 | PRJNA313185 | (8) |
| <b>124</b> | ITM_081681 | Human | Benin | 2008 | PRJNA313185 | (8) |
| <b>125</b> | ITM_082696 | Human | Benin | 2008 | PRJNA313185 | (8) |
| <b>126</b> | ITM_091801 | Human | Benin | 2009 | PRJNA313185 | (8) |
| <b>127</b> | ITM_092101 | Human | Benin | 2009 | PRJNA313185 | (8) |
| <b>128</b> | ITM_093694 | Human | Benin | 2009 | PRJNA313185 | (8) |
| <b>129</b> | ITM_100126 | Human | Benin | 2010 | PRJNA313185 | (8) |
| <b>130</b> | ITM_951009 | Human | Benin | 1995 | PRJNA313185 | (8) |
| <b>131</b> | ITM_021433 | Human | Benin | 2002 | PRJNA313185 | (8) |
| <b>132</b> | ITM_022045 | Human | Benin | 2002 | PRJNA313185 | (8) |
| <b>133</b> | ITM_022287 | Human | Benin | 2002 | PRJNA313185 | (8) |
| <b>134</b> | ITM_022875 | Human | Benin | 2002 | PRJNA313185 | (8) |
| <b>135</b> | ITM_030717 | Human | Benin | 2003 | PRJNA313185 | (8) |

|            |            |       |       |      |             |     |
|------------|------------|-------|-------|------|-------------|-----|
| <b>136</b> | ITM_030718 | Human | Benin | 2003 | PRJNA313185 | (8) |
| <b>137</b> | ITM_031892 | Human | Benin | 2003 | PRJNA313185 | (8) |
| <b>138</b> | ITM_071804 | Human | Benin | 2007 | PRJNA313185 | (8) |
| <b>139</b> | ITM_030791 | Human | Benin | 2003 | PRJNA313185 | (8) |
| <b>140</b> | ITM_970680 | Human | Benin | 1997 | PRJNA313185 | (8) |
| <b>141</b> | ITM_021434 | Human | Benin | 2002 | PRJNA313185 | (8) |
| <b>142</b> | ITM_012596 | Human | Benin | 2001 | PRJNA313185 | (8) |
| <b>143</b> | ITM_071938 | Human | Benin | 2007 | PRJNA313185 | (8) |
| <b>144</b> | ITM_020585 | Human | Benin | 2001 | PRJNA313185 | (8) |
| <b>145</b> | ITM_052188 | Human | Benin | 2005 | PRJNA313185 | (8) |
| <b>146</b> | ITM_060218 | Human | Benin | 2005 | PRJNA313185 | (8) |
| <b>147</b> | ITM_121000 | Human | Benin | 2012 | PRJNA313185 | (8) |
| <b>148</b> | ITM_032343 | Human | Benin | 2003 | PRJNA313185 | (8) |
| <b>149</b> | ITM_091405 | Human | Benin | 2009 | PRJNA313185 | (8) |
| <b>150</b> | ITM_051510 | Human | Benin | 2005 | PRJNA313185 | (8) |
| <b>151</b> | ITM_030950 | Human | Benin | 2003 | PRJNA313185 | (8) |

|            |            |       |          |      |             |     |
|------------|------------|-------|----------|------|-------------|-----|
| <b>152</b> | ITM_030716 | Human | Benin    | 2003 | PRJNA313185 | (8) |
| <b>153</b> | ITM_073459 | Human | Benin    | 2007 | PRJNA313185 | (8) |
| <b>154</b> | Mu_282-5   | Human | Benin    | 2011 | PRJNA313185 | (8) |
| <b>155</b> | Mu_283-8   | Human | Benin    | 2011 | PRJNA313185 | (8) |
| <b>156</b> | ITM_070625 | Human | Nigeria  | 2007 | PRJNA313185 | (8) |
| <b>157</b> | ITM_102686 | Human | Nigeria  | 2010 | PRJNA313185 | (8) |
| <b>158</b> | ITM_112512 | Human | Nigeria  | 2011 | PRJNA313185 | (8) |
| <b>159</b> | ITM_121398 | Human | Nigeria  | 2012 | PRJNA313185 | (8) |
| <b>160</b> | ITM_070386 | Human | Nigeria  | 2007 | PRJNA313185 | (8) |
| <b>161</b> | ITM_121474 | Human | Nigeria  | 2012 | PRJNA313185 | (8) |
| <b>162</b> | ITM102686  | Human | Nigeria  | 2010 | ND          | (1) |
| <b>163</b> | Mu_12-29   | Human | Cameroon | 2012 | PRJNA313185 | (8) |
| <b>164</b> | Mu_08-51   | Human | Cameroon | 2008 | PRJNA313185 | (8) |
| <b>165</b> | Mu_12-79   | Human | Cameroon | 2012 | PRJNA313185 | (8) |
| <b>166</b> | Mu_08-47   | Human | Cameroon | 2008 | PRJNA313185 | (8) |
| <b>167</b> | Mu_11-30   | Human | Cameroon | 2011 | PRJNA313185 | (8) |

|            |            |       |          |      |             |     |
|------------|------------|-------|----------|------|-------------|-----|
| <b>168</b> | Mu_11-210  | Human | Cameroon | 2011 | PRJNA313185 | (8) |
| <b>169</b> | Mu_12-98   | Human | Cameroon | 2012 | PRJNA313185 | (8) |
| <b>170</b> | Mu_08-186  | Human | Cameroon | 2008 | PRJNA313185 | (8) |
| <b>171</b> | Mu_11-33   | Human | Cameroon | 2011 | PRJNA313185 | (8) |
| <b>172</b> | Mu_11-263  | Human | Cameroon | 2011 | PRJNA313185 | (8) |
| <b>173</b> | Mu_12-53   | Human | Cameroon | 2012 | PRJNA313185 | (8) |
| <b>174</b> | Mu_11-20   | Human | Cameroon | 2011 | PRJNA313185 | (8) |
| <b>175</b> | ITM_020280 | Human | Cameroon | 2002 | PRJNA313185 | (8) |
| <b>176</b> | ITM_021081 | Human | Cameroon | 2002 | PRJNA313185 | (8) |
| <b>177</b> | ITM_9103   | Human | Cameroon | 1970 | PRJNA313185 | (8) |
| <b>178</b> | ITM_120141 | Human | Cameroon | 2011 | PRJNA313185 | (8) |
| <b>179</b> | ITM_120142 | Human | Cameroon | 2011 | PRJNA313185 | (8) |
| <b>180</b> | ITM_020279 | Human | Cameroon | 2002 | PRJNA313185 | (8) |
| <b>181</b> | ITM_120140 | Human | Cameroon | 2011 | PRJNA313185 | (8) |
| <b>182</b> | ITM_091067 | Human | Gabon    | 2009 | PRJNA313185 | (8) |
| <b>183</b> | ITM_110450 | Human | Gabon    | 2011 | PRJNA313185 | (8) |

|            |            |       |               |      |             |     |
|------------|------------|-------|---------------|------|-------------|-----|
| <b>184</b> | ITM_101500 | Human | Gabon         | 2010 | PRJNA313185 | (8) |
| <b>185</b> | ITM_110893 | Human | Gabon         | 2011 | PRJNA313185 | (8) |
| <b>186</b> | ITM_111662 | Human | Gabon         | 2011 | PRJNA313185 | (8) |
| <b>187</b> | ITM_001211 | Human | Côte d'Ivoire | 2000 | PRJNA313185 | (8) |
| <b>188</b> | ITM_940659 | Human | Côte d'Ivoire | 1994 | PRJNA313185 | (8) |
| <b>189</b> | ITM_940815 | Human | Côte d'Ivoire | 1994 | PRJNA313185 | (8) |
| <b>190</b> | ITM_940816 | Human | Côte d'Ivoire | 1994 | PRJNA313185 | (8) |
| <b>191</b> | ITM_940821 | Human | Côte d'Ivoire | 1994 | PRJNA313185 | (8) |
| <b>192</b> | ITM_980341 | Human | Côte d'Ivoire | 1998 | PRJNA313185 | (8) |
| <b>193</b> | ITM_980342 | Human | Côte d'Ivoire | 1998 | PRJNA313185 | (8) |
| <b>194</b> | ITM_990012 | Human | Côte d'Ivoire | 1998 | PRJNA313185 | (8) |
| <b>195</b> | ITM_990321 | Human | Côte d'Ivoire | 1998 | PRJNA313185 | (8) |
| <b>196</b> | ITM_991770 | Human | Côte d'Ivoire | 1999 | PRJNA313185 | (8) |
| <b>197</b> | ITM_940662 | Human | Côte d'Ivoire | 1994 | PRJNA313185 | (8) |
| <b>198</b> | ITM_990006 | Human | Côte d'Ivoire | 1998 | PRJNA313185 | (8) |
| <b>199</b> | ITM_990734 | Human | Côte d'Ivoire | 1999 | PRJNA313185 | (8) |

|            |                      |                |               |      |             |      |          |
|------------|----------------------|----------------|---------------|------|-------------|------|----------|
| <b>200</b> | ITM_991632           | Human          | Côte d'Ivoire | 1999 | PRJNA313185 | (8)  |          |
| <b>201</b> | ITM_000483           | Human          | Côte d'Ivoire | 2000 | PRJNA313185 | (8)  |          |
| <b>202</b> | ITM_000870           | Human          | Côte d'Ivoire | 2000 | PRJNA313185 | (8)  |          |
| <b>203</b> | ITM_000869           | Human          | Côte d'Ivoire | 2000 | PRJNA313185 | (8)  |          |
| <b>204</b> | ITM_990007           | Human          | Côte d'Ivoire | 1998 | PRJNA313185 | (8)  |          |
| <b>205</b> | ITM_991633           | Human          | Côte d'Ivoire | 1999 | PRJNA313185 | (8)  |          |
| <b>206</b> | ITM_990008           | Human          | Côte d'Ivoire | 1998 | PRJNA313185 | (8)  |          |
| <b>207</b> | IC21                 | Human          | Côte d'Ivoire | ND   | ERA401876   | (1)  |          |
| <b>208</b> | IC38                 | Human          | Côte d'Ivoire | ND   | ERA401876   | (1)  |          |
| <b>209</b> | ITM 940662           | Human          | Côte d'Ivoire | ND   | ND          | (6)  |          |
| <b>210</b> | ITM 940815           | Human          | Côte d'Ivoire | ND   | ND          | (6)  |          |
| <b>211</b> | ITM 940511           | Human          | Côte d'Ivoire | ND   | ND          | (6)  |          |
| <b>212</b> | Cu001                | Human          | Côte d'Ivoire | ND   | ND          | (9)  |          |
| <b>213</b> | Nau.CI.001           | Aquatic insect | Côte d'Ivoire | 2002 | ND          | (13) |          |
| <b>214</b> | Nau.CI.002           | Aquatic insect | Côte d'Ivoire | 2002 | ND          | (13) |          |
| <b>215</b> | ITM 5150<br>(C05150) | Human          | DRC           | ND   | ND          | (6)  | BCCM-ITM |

|            |            |       |     |      |             |      |
|------------|------------|-------|-----|------|-------------|------|
| <b>216</b> | ITM 5151   | Human | DRC | ND   | ND          | (6)  |
| <b>217</b> | ITM 5155   | Human | DRC | ND   | ND          | (6)  |
| <b>218</b> | ITM 5153   | Human | DRC | ND   | ND          | (5)  |
| <b>219</b> | PORT       | Human | DRC | 1969 | ND          | (10) |
| <b>220</b> | ITM_072398 | Human | DRC | 2006 | PRJNA313185 | (8)  |
| <b>221</b> | ITM_072401 | Human | DRC | 2007 | PRJNA313185 | (8)  |
| <b>222</b> | ITM_072732 | Human | DRC | 2007 | PRJNA313185 | (8)  |
| <b>223</b> | ITM_072733 | Human | DRC | 2007 | PRJNA313185 | (8)  |
| <b>224</b> | ITM_072734 | Human | DRC | 2007 | PRJNA313185 | (8)  |
| <b>225</b> | ITM_072735 | Human | DRC | 2007 | PRJNA313185 | (8)  |
| <b>226</b> | ITM_072840 | Human | DRC | 2007 | PRJNA313185 | (8)  |
| <b>227</b> | ITM_072841 | Human | DRC | 2007 | PRJNA313185 | (8)  |
| <b>228</b> | ITM_073453 | Human | DRC | 2007 | PRJNA313185 | (8)  |
| <b>229</b> | ITM_073479 | Human | DRC | 2007 | PRJNA313185 | (8)  |
| <b>230</b> | ITM_082600 | Human | DRC | 2007 | PRJNA313185 | (8)  |
| <b>231</b> | ITM_100140 | Human | DRC | 2009 | PRJNA313185 | (8)  |

|            |            |       |       |      |             |     |
|------------|------------|-------|-------|------|-------------|-----|
| <b>232</b> | ITM_100141 | Human | DRC   | 2009 | PRJNA313185 | (8) |
| <b>233</b> | ITM_100142 | Human | DRC   | 2009 | PRJNA313185 | (8) |
| <b>234</b> | ITM_100832 | Human | DRC   | 2009 | PRJNA313185 | (8) |
| <b>235</b> | ITM_100833 | Human | DRC   | 2009 | PRJNA313185 | (8) |
| <b>236</b> | ITM_032481 | Human | DRC   | 2003 | PRJNA313185 | (8) |
| <b>237</b> | ITM_070123 | Human | DRC   | 2006 | PRJNA313185 | (8) |
| <b>238</b> | ITM_092479 | Human | DRC   | 2009 | PRJNA313185 | (8) |
| <b>239</b> | ITM_073463 | Human | DRC   | 2007 | PRJNA313185 | (8) |
| <b>240</b> | ITM_073477 | Human | DRC   | 2007 | PRJNA313185 | (8) |
| <b>241</b> | ITM_063519 | Human | DRC   | 2006 | PRJNA313185 | (8) |
| <b>242</b> | ITM_5151   | Human | DRC   | 1972 | PRJNA313185 | (8) |
| <b>243</b> | ITM_050303 | Human | Congo | 1979 | PRJNA313185 | (8) |
| <b>244</b> | ITM_071924 | Human | Congo | 2007 | PRJNA313185 | (8) |
| <b>245</b> | ITM_071925 | Human | Congo | 2007 | PRJNA313185 | (8) |
| <b>246</b> | ITM_993355 | Human | Togo  | 1999 | PRJNA313185 | (8) |
| <b>247</b> | ITM991591  | Human | Togo  | 1999 | ND          | (1) |



|            |                         |       |                     |      |             |      |      |
|------------|-------------------------|-------|---------------------|------|-------------|------|------|
| <b>248</b> | ITM 970680              | Human | Togo                | ND   | ND          | (6)  |      |
| <b>249</b> | ITM_991591              | Human | Togo                | 1999 | PRJNA313185 | (8)  |      |
| <b>250</b> | ITM_000909              | Human | Togo                | 1999 | PRJNA313185 | (8)  |      |
| <b>251</b> | ITM 960657              | Human | Angola              | ND   | ND          | (6)  |      |
| <b>252</b> | ITM 960658              | Human | Angola              | ND   | ND          | (6)  |      |
| <b>253</b> | ITM_960658              | Human | Angola              | 1996 | PRJNA313185 | (8)  |      |
| <b>254</b> | ITM_960657              | Human | Angola              | 1996 | PRJNA313185 | (8)  |      |
| <b>255</b> | ITM_083232              | Human | Angola              | 2008 | PRJNA313185 | (8)  |      |
| <b>256</b> | ITM_073478              | Human | Angola              | 2007 | PRJNA313185 | (8)  |      |
| <b>257</b> | NCTC 10445<br>(Clancey) | Human | Uganda              | 1964 | ND          | (14) | NCTC |
| <b>258</b> | ITM_051459              | Human | Uganda              | 1964 | PRJNA313185 | (8)  |      |
| <b>259</b> | ITM 9357                | Human | Papua New<br>Guinea | ND   | ND          | (15) |      |
| <b>260</b> | ITM 941331              | Human | Papua New<br>Guinea | ND   | ND          | (6)  |      |
| <b>261</b> | ITM 9537                | Human | Papua New           | ND   | ND          | (6)  |      |

Guinea

|            |             |       |                  |      |             |      |
|------------|-------------|-------|------------------|------|-------------|------|
|            |             |       | Papua New Guinea |      |             | (8)  |
| <b>262</b> | Mu_V71_2005 | Human | Guinea           | 2005 | PRJNA313185 |      |
|            |             |       | Papua New Guinea |      |             | (8)  |
| <b>263</b> | ITM_9537    | Human | Guinea           | 1971 | PRJNA313185 |      |
|            |             |       | Papua New Guinea |      |             |      |
| <b>264</b> | VIDRL 71    | Human | Guinea           | ND   | ND          | (16) |
| <b>265</b> | 94-1324     | Human | Australia        | 1994 | ND          | (10) |
| <b>266</b> | 94-1325     | Human | Australia        | 1994 | ND          | (10) |
| <b>267</b> | 94-1326     | Human | Australia        | 1994 | ND          | (10) |
| <b>268</b> | 94-1327     | Human | Australia        | 1994 | ND          | (10) |
| <b>269</b> | 94-1328     | Human | Australia        | 1994 | ND          | (10) |
| <b>270</b> | TS-1        | Human | Australia        | 1999 | ND          | (10) |
| <b>271</b> | TS-2        | Human | Australia        | 1978 | ND          | (10) |
| <b>272</b> | TS-3        | Human | Australia        | 1999 | ND          | (10) |
| <b>273</b> | TS-4        | Human | Australia        | 1999 | ND          | (10) |

|            |                     |       |           |      |           |      |          |
|------------|---------------------|-------|-----------|------|-----------|------|----------|
| <b>274</b> | TS-6                | Human | Australia | 1999 | ND        | (10) |          |
| <b>275</b> | ITM 884             | Human | Australia | ND   | ND        | (15) |          |
| <b>276</b> | ITM 941324          | Human | Australia | ND   | ND        | (6)  |          |
| <b>277</b> | ITM 941325          | Human | Australia | ND   | ND        | (6)  |          |
| <b>278</b> | ITM 941327          | Human | Australia | ND   | ND        | (6)  | BCCM-ITM |
| <b>279</b> | ITM 9549            | Human | Australia | ND   | ND        | (6)  |          |
| <b>280</b> | ITM 9550            | Human | Australia | ND   | ND        | (6)  |          |
| <b>281</b> | ITM 8849            | Human | Australia | ND   | ND        | (6)  |          |
| <b>282</b> | ITM 940339          | Human | Australia | ND   | ND        | (6)  |          |
| <b>283</b> | ITM 5142            | Human | Australia | ND   | ND        | (6)  |          |
| <b>284</b> | ITM 5147            | Human | Australia | ND   | ND        | (6)  |          |
| <b>285</b> | Mu_13822-70         | Human | Australia | 1971 | ND        | (2)  |          |
| <b>286</b> | Mu_113<br>(5152838) | Human | Australia | 2005 | SRP004497 | (2)  |          |
| <b>287</b> | Mu_119<br>(5159089) | Human | Australia | 2005 | SRP004497 | (2)  |          |
| <b>288</b> | Mu_74 (4140710)     | Human | Australia | 2004 | SRP004497 | (2)  |          |
| <b>289</b> | Mu_81 (4149669)     | Human | Australia | 2004 | SRP004497 | (2)  |          |

|            |                 |        |           |      |           |      |
|------------|-----------------|--------|-----------|------|-----------|------|
| <b>290</b> | Mu_93 (5131622) | Human  | Australia | 2005 | SRP004497 | (2)  |
| <b>291</b> | Mu_05142109     | Possum | Australia | 2005 | SRP004497 | (2)  |
| <b>292</b> | Mu_JKD8170      | Possum | Australia | 2008 | SRP004497 | (2)  |
| <b>293</b> | Mu_08009899     | Human  | Australia | 2008 | SRP004497 | (2)  |
| <b>294</b> | Mu_JKD8049      | Human  | Australia | 2004 | SRP004497 | (2)  |
| <b>295</b> | VIDRL 04140328  | Human  | Australia | 2004 | ND        | (16) |
| <b>296</b> | VIDRL 08012087  | Human  | Australia | 2008 | ND        | (16) |
| <b>297</b> | 11098/78        | Human  | Australia | ND   | ND        | (16) |
| <b>298</b> | VIDRL 02101784  | Human  | Australia | 2002 | ND        | (16) |
| <b>299</b> | VIDRL 02154405  | Human  | Australia | 2002 | ND        | (16) |
| <b>300</b> | VIDRL 03122220  | Human  | Australia | 2003 | ND        | (16) |
| <b>301</b> | VIDRL 03157945  | Human  | Australia | 2003 | ND        | (16) |
| <b>302</b> | VIDRL 11140807  | Human  | Australia | 2011 | ND        | (16) |
| <b>303</b> | VIDRL 02158971  | Human  | Australia | 2002 | ND        | (16) |
| <b>304</b> | VIDRL 10102087  | Human  | Australia | 2010 | ND        | (16) |
| <b>305</b> | VIDRL 11128712  | Human  | Australia | 2011 | ND        | (16) |

|            |                                          |       |           |      |                       |      |                |
|------------|------------------------------------------|-------|-----------|------|-----------------------|------|----------------|
| <b>306</b> | VIDRL 12100540                           | Human | Australia | 2011 | ND                    | (16) |                |
| <b>307</b> | VIDRL 11154235                           | Human | Australia | 2011 | ND                    | (16) |                |
| <b>308</b> | VIDRL 11159290                           | Human | Australia | 2011 | ND                    | (16) |                |
| <b>309</b> | C05142/<br>ATCC 19423/<br>NCTC 10417 (*) | Human | Australia | 1948 | ND                    | (17) | ATCC/NCTC/BCCM |
| <b>310</b> | M000932                                  | Human | Australia | 1967 | ND                    | ND   | BCCM-ITM       |
| <b>311</b> | NCTC 10013<br>(Edwards)                  | Human | Australia | 1958 | ND                    | (14) | NCTC           |
| <b>312</b> | NCTC 10467<br>(Darwin)                   | Human | Australia | 1961 | ND                    | (18) | NCTC           |
| <b>313</b> | NCTC 10468<br>(McKenzie)                 | Human | Australia | 1963 | ND                    | (19) | NCTC           |
| <b>314</b> | 1615                                     | Human | Malaysia  | 1964 | ND                    | (10) |                |
| <b>315</b> | 185235                                   | Human | Malaysia  | ND   | ND                    | (16) |                |
| <b>316</b> | ITM 941328                               | Human | Malaysia  | ND   | ND                    | (6)  |                |
| <b>317</b> | 702                                      | Human | Japan     | ND   | AP017624-<br>AP017625 | (5)  | BCCM-ITM       |
| <b>318</b> | Mu_8765<br>(ITM8765)                     | Human | Japan     | 1980 | ND                    | (2)  |                |
| <b>319</b> | 98-912                                   | Human | China     | 1997 | ND                    | (10) |                |

|            |                                     |       |               |      |                |      |          |
|------------|-------------------------------------|-------|---------------|------|----------------|------|----------|
| <b>320</b> | ITM 980912                          | Human | China         | ND   | ND             | (6)  |          |
| <b>321</b> | 70290                               | Human | China         | 2007 | ND             | ND   | BCCM-ITM |
| <b>322</b> | ITM 5114                            | Human | Mexico        | 2008 | ND             | (6)  | BCCM-ITM |
| <b>323</b> | C05143                              | Human | Mexico        | 1990 | ND             | (6)  | BCCM-ITM |
| <b>324</b> | ITM 7922                            | Human | French Guiana | ND   | ND             | (6)  |          |
| <b>325</b> | ITM 7832 (CIPT<br>141090018)        | Human | French Guiana | ND   | ND             | (5)  |          |
| <b>326</b> | 1G897                               | Human | French Guiana | 1992 | ND             | (13) |          |
| <b>327</b> | Mu_1G897                            | Human | French Guiana | 1988 | ND             | (2)  |          |
| <b>328</b> | MuFG11                              | Human | French Guiana | 2010 | ND             | (20) |          |
| <b>329</b> | MuFG100                             | Human | French Guiana | 2011 | ND             | (20) |          |
| <b>330</b> | MuFG102                             | Human | French Guiana | 2013 | ND             | (20) |          |
| <b>331</b> | MuFG123                             | Human | French Guiana | 1994 | ND             | (20) |          |
| <b>332</b> | MuFG124                             | Human | French Guiana | 1994 | ND             | (20) |          |
| <b>333</b> | MuFG125                             | Human | French Guiana | 1995 | ND             | (20) |          |
| <b>334</b> | ITM 842                             | Human | Surinam       | ND   | ND             | (6)  |          |
| <b>335</b> | <i>M. ulcerans</i> strain<br>Harvey | Human | USA           | 2012 | JAOL01000097.1 | ND   |          |

|     |                                 |       |        |      |    |      |          |
|-----|---------------------------------|-------|--------|------|----|------|----------|
| 336 | 128FXT                          | Human | USA    | 2001 | ND | (20) |          |
| 337 | 92078                           | Human | France | 2009 | ND | ND   | BCCM-ITM |
| 338 | ATCC 25900                      | Human | ND     | ND   | ND | ND   | ATCC     |
| 339 | ATCC 35839<br>(TMC 1603 (K.R.)) | Human | ND     | ND   | ND | ND   | ATCC     |
| 340 | ATCC 25899<br>(Borstel 5391)    | Human | ND     | ND   | ND | ND   | ATCC     |
| 341 | ATCC 25898<br>(Borstel 5390)    | Human | ND     | ND   | ND | ND   | ATCC     |

**Legend:**

- **ATCC:** American Type Culture Collection
- **BCCM-ITM:** Belgian Coordinated Collections of Microorganisms-Institute of Tropical Medicine
- **ID:** identification
- **ND:** not determined

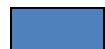

- Environmental isolates.

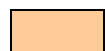

- Strains available from ATCC, BCCM-ITM and NCTC collections.

- (\*) the type strain.

## References

1. **Ablordey AS, Vandelannoote K, Frimpong IA, Ahortor EK, Amissah NA, Eddyani M, Durnez L, Portaels F, de Jong BC, Leirs H, Porter JL, Mangas KM, Lam MMC, Buultjens A, Seemann T, Tobias NJ, Stinear TP.** 2015. Whole Genome Comparisons Suggest Random Distribution of *Mycobacterium ulcerans* Genotypes in a Buruli Ulcer Endemic Region of Ghana. *PLoS Negl Trop Dis* **9**:e0003681.
2. **Doig KD, Holt KE, Fyfe JAM, Lavender CJ, Eddyani M, Portaels F, Yeboah-Manu D, Pluschke G, Seemann T, Stinear TP.** 2012. On the origin of *Mycobacterium ulcerans*, the causative agent of Buruli ulcer. *BMC Genomics* **13**:258-258.
3. **Qi W, Käser M, Röltgen K, Yeboah-Manu D, Pluschke G.** 2009. Genomic Diversity and Evolution of *Mycobacterium ulcerans* Revealed by Next-Generation Sequencing. *PLoS Pathogens* **5**:e1000580.
4. **Lamelas A, Ampah KA, Aboagye S, Kerber S, Danso E, Asante-Poku A, Asare P, Parkhill J, Harris SR, Pluschke G, Yeboah-Manu D, Röltgen K.** 2016. Spatiotemporal Co-existence of Two *Mycobacterium ulcerans* Clonal Complexes in the Offin River Valley of Ghana. *PLoS Neglected Tropical Diseases* **10**:e0004856.
5. **Guimaraes-Peres A, Portaels F, de Rijk P, Fissette K, Pattyn SR, van Vooren J-P, Fonteyne P-A.** 1999. Comparison of Two PCRs for Detection of *Mycobacterium ulcerans*. *Journal of Clinical Microbiology* **37**:206-208.



6. **Kaser M, Pluschke G.** 2008. Differential gene repertoire in *Mycobacterium ulcerans* identifies candidate genes for patho-adaptation. *PLoS Negl Trop Dis* **2**:23.
7. **Aboagye SY, Danso E, Ampah KA, Nakobu Z, Asare P, Otchere ID, Roltgen K, Yirenya-Tawiah D, Yeboah-Manu D.** 2016. Isolation of Nontuberculous *Mycobacteria* from the Environment of Ghanaian Communities Where Buruli Ulcer Is Endemic. *Appl Environ Microbiol* **82**:4320-4329.
8. **Vandelannoote K, Meehan CJ, Eddyani M, Affolabi D, Phanzu DM, Eyangoh S, Jordaens K, Portaels F, Mangas K, Seemann T, Marsollier L, Marion E, Chauty A, Landier J, Fontanet A, Leirs H, Stinear TP, de Jong BC.** 2017. Multiple introductions and recent spread of the emerging human pathogen *Mycobacterium ulcerans* across Africa. *Genome Biol Evol.*
9. **Zhang T, Bishai WR, Grosset JH, Nuermberger EL.** 2010. Rapid assessment of antibacterial activity against *Mycobacterium ulcerans* by using recombinant luminescent strains. *Antimicrob Agents Chemother* **54**:2806-2813.
10. **Mve-Obiang A, Lee RE, Portaels F, Small PL.** 2003. Heterogeneity of mycolactones produced by clinical isolates of *Mycobacterium ulcerans*: implications for virulence. *Infect Immun* **71**:774-783.
11. **Portaels F, Meyers WM, Ablordey A, Castro AG, Chemlal K, de Rijk P, Elsen P, Fissette K, Fraga AG, Lee R, Mahrous E, Small PLC, Stragier P, Torrado E, Van Aerde A, Silva MT, Pedrosa J.** 2008. First Cultivation and Characterization of *Mycobacterium ulcerans* from the Environment. *PLoS Negl Trop Dis* **2**:e178.

12. **Hilty M, Kaser M, Zinsstag J, Stinear T, Pluschke G.** 2007. Analysis of the *Mycobacterium ulcerans* genome sequence reveals new loci for variable number tandem repeats (VNTR) typing. *Microbiology* **153**:1483-1487.
13. **Marsollier L, Honore N, Legras P, Manceau AL, Kouakou H, Carbonnelle B, Cole ST.** 2003. Isolation of three *Mycobacterium ulcerans* strains resistant to rifampin after experimental chemotherapy of mice. *Antimicrob Agents Chemother* **47**:1228-1232.
14. **Clancey JK.** 1964. Mycobacterial Skin Ulcers in Uganda: Description of a New Mycobacterium (*Mycobacterium Buruli*). *J Pathol Bacteriol* **88**:175-187.
15. **Hilty M, Yeboah-Manu D, Boakye D, Mensah-Quainoo E, Rondini S, Schelling E, Ofori-Adjei D, Portaels F, Zinsstag J, Pluschke G.** 2006. Genetic Diversity in *Mycobacterium ulcerans* Isolates from Ghana Revealed by a Newly Identified Locus Containing a Variable Number of Tandem Repeats. *Journal of Bacteriology* **188**:1462-1465.
16. **Lavender CJ, Globan M, Johnson PD, Charles PG, Jenkin GA, Ghosh N, Clark BM, Martinello M, Fyfe JA.** 2012. Buruli ulcer disease in travelers and differentiation of *Mycobacterium ulcerans* strains from northern Australia. *J Clin Microbiol* **50**:3717-3721.
17. **Mac Callum P, Tolhurst JC, et al.** 1948. A new mycobacterial infection in man. *J Pathol Bacteriol* **60**:93-122.
18. **Quinn JV, Crotty JM.** 1963. *Mycobacterium Ulcerans* Infections in the Northern Territory. *Med J Aust* **2**:317-319.
19. **Lane D.** 1964. *Mycobacterium Ulcerans* Infection in Queensland. *Med J Aust* **1**:124-125.

20. **Reynaud Y, Millet J, Couvin D, Rastogi N, Brown C, Couppié P, Legrand E.** 2015. Heterogeneity among *Mycobacterium ulcerans* from French Guiana Revealed by Multilocus Variable Number Tandem Repeat Analysis (MLVA). PLOS ONE **10**:e0118597.
